# Supplementary material for: Expression of aspartyl protease and C3HC4-type RING zinc finger genes are responsive to ascorbic acid in Arabidopsis thaliana
Source: PubMed Central journal article supplement — J Exp Bot. 2011 Mar 18;62(10):3647–57. doi: 10.1093/jxb/err068 (PMC3130181; doi:10.1093/jxb/err068), 2011-03-18
Supplement: supp_err068_00059766-file002.pdf [file supp_err068_00059766-file002.pdf]

## Expression of aspartyl protease and C3HC4-type RING zinc finger genes are responsive to ascorbic acid in *Arabidopsis thaliana*

*Yongshun Gao, Hitoshi Nishikawa, Adebajo Badejo, Hitoshi Shibata, Yoshihiro Sawa, Tsuyoshi Nakagawa, Takanori Maruta, Shigeru Shigeoka, Nick Smirnov, and Takahiro Ishikawa*

Supplementary Table S1 – see .xls file

Supplementary Table S2.

| Number | Affymetrix probe | AGI Number | Description                                                                   | Fold  |
|--------|------------------|------------|-------------------------------------------------------------------------------|-------|
| 1      | 256525_at        | AT1G66180  | aspartyl protease family protein                                              | 5.38  |
| 2      | 259681_at        | AT1G77760  | nitrate reductase 1 (NR1)                                                     | 5.33  |
| 3      | 246919_at        | AT5G25460  | expressed protein                                                             | 4.16  |
| 4      | 245451_at        | AT4G16890  | disease resistance protein (TIR-NBS-LRR class), putative                      | 4.44  |
| 5      | 261927_at        | AT1G22500  | zinc finger (C3HC4-type RING finger) family protein                           | 4.28  |
| 6      | 254743_at        | AT4G13420  | potassium transporter (HAK5)                                                  | 28.41 |
| 7      | 259839_at        | AT1G52190  | proton-dependent oligopeptide transport (POT) family protein                  | 4.4   |
| 8      | 250045_at        | AT5G17700  | MATE efflux family protein                                                    | 6.11  |
| 9      | 262373_at        | AT1G73120  | expressed protein                                                             | 20.21 |
| 10     | 250277_at        | AT5G12940  | leucine-rich repeat family protein                                            | 4.06  |
| 11     | 255177_at        | AT4G08040  | 1-aminocyclopropane-1-carboxylate synthase, putative / ACC synthase, putative | 4.51  |
| 12     | 252011_at        | AT3G52720  | carbonic anhydrase family protein                                             | 4.43  |
| 13     | 262045_at        | AT1G80240  | expressed protein                                                             | 7.76  |
| 14     | 262628_at        | AT1G06490  | glycosyl transferase family 48 protein                                        | 4.14  |

**Fig. S1.** Effect of L-GalL supplementation on total AsA concentration in the AsA deficient *Arabidopsis* mutant *vtc2-1*. Excised leaves from *vtc2-1* plants were fed with 5 mM L-GalL or water (control) in the light ( $80 \mu\text{mol photons m}^{-2} \text{s}^{-1}$ ). Left panel, detached *vtc2-1* leaves fed with water. Right panel, *vtc2-1* leaves fed with 5 mM L-GalL. Data are the mean values  $\pm$  SD from three independent experiments. Values that are significantly different from control according to Student's *t*-test are indicated ; <sup>a</sup>,  $p < 0.01$ ; <sup>b</sup>,  $p < 0.001$ .

**Fig. S2.** Effect of DHA feeding on AsA concentration and transcript levels of two L-GalL responsive genes in *vtc2-1* mutant. Excised leaves from plants were fed with 5 mM DHA in the light ( $80 \mu\text{mol photons m}^{-2} \text{s}^{-1}$ ) for 3 and 6 h. Total AsA concentration in leaves (A). Relative transcript levels of genes At1g66180 and At1g22500 (B). The transcript levels were normalized against *Actin-2*. Data are the mean values  $\pm$  SD of three independent experiments. Values that are significantly different from control according to Student's *t*-test are indicated; <sup>a</sup>,  $p < 0.05$ ; <sup>b</sup>,  $p < 0.01$ ; <sup>c</sup>,  $p < 0.001$ .

**Fig. S3.** Effect of DHA feeding on AsA concentration and transcript levels of two L-GalL responsive genes in *Arabidopsis thaliana* wild type. Excised leaves from plants were fed with 5 mM DHA in the light ( $80 \mu\text{mol photons m}^{-2} \text{s}^{-1}$ ) for 3 and 6 h. Total AsA concentration in leaves (A). Relative transcript levels of genes At1g66180 and At1g22500 (B). The transcript levels were normalized against *Actin-2*. Data are the mean values  $\pm$  SD of three independent experiments. Values that are significantly different from control according to Student's *t*-test are indicated; <sup>a</sup>,  $p < 0.05$ ; <sup>b</sup>,  $p < 0.01$ ; <sup>c</sup>,  $p < 0.001$ .

**Fig. S4.** GO analysis of 337 genes whose transcript levels were increased 2-fold or more by L-GalL.

**Fig. S5.** Expression pattern over a range of experimental treatments of L-GalL-responsive genes. Eight genes shown by qRT-PCR to be induced by L-GalL treatment of *Arabidopsis thaliana vtc2-1* leaves (A). Top 50 L-GalL-induced genes from Affymetrix GeneChip analysis (B). Gene expression patterns were determined with the Genevestigator tool (<https://www.genevestigator.com/gv/index.jsp>).

**Fig. S6.** Transcripts levels of reference genes in each group of samples. To evaluate the

most stable reference gene for our experiments, qPCR was performed using specific primers of the selected reference genes (“Materials and Methods”). All the cDNA templates were prepared with the same concentration to detect the stability of candidate reference genes. The axis of “Quantity” indicates the raw data. (A) Transcript levels of 3 reference genes over a 24 h time course in *vtc2-1* following feeding with 5 mM L-GalL; (B) Transcript levels of 3 reference genes in *vtc2-1* following feeding with H<sub>2</sub>O, 5 mM D-Glc, L-GalL and AsA in the dark; (C) Transcript levels of 3 reference genes in WT following the cycle of 48 h light, 48 h dark and 48 h light; (D) Transcript levels of 3 reference genes in WT following feeding with H<sub>2</sub>O, 5 mM D-Glc, L-GalL and AsA in the light.

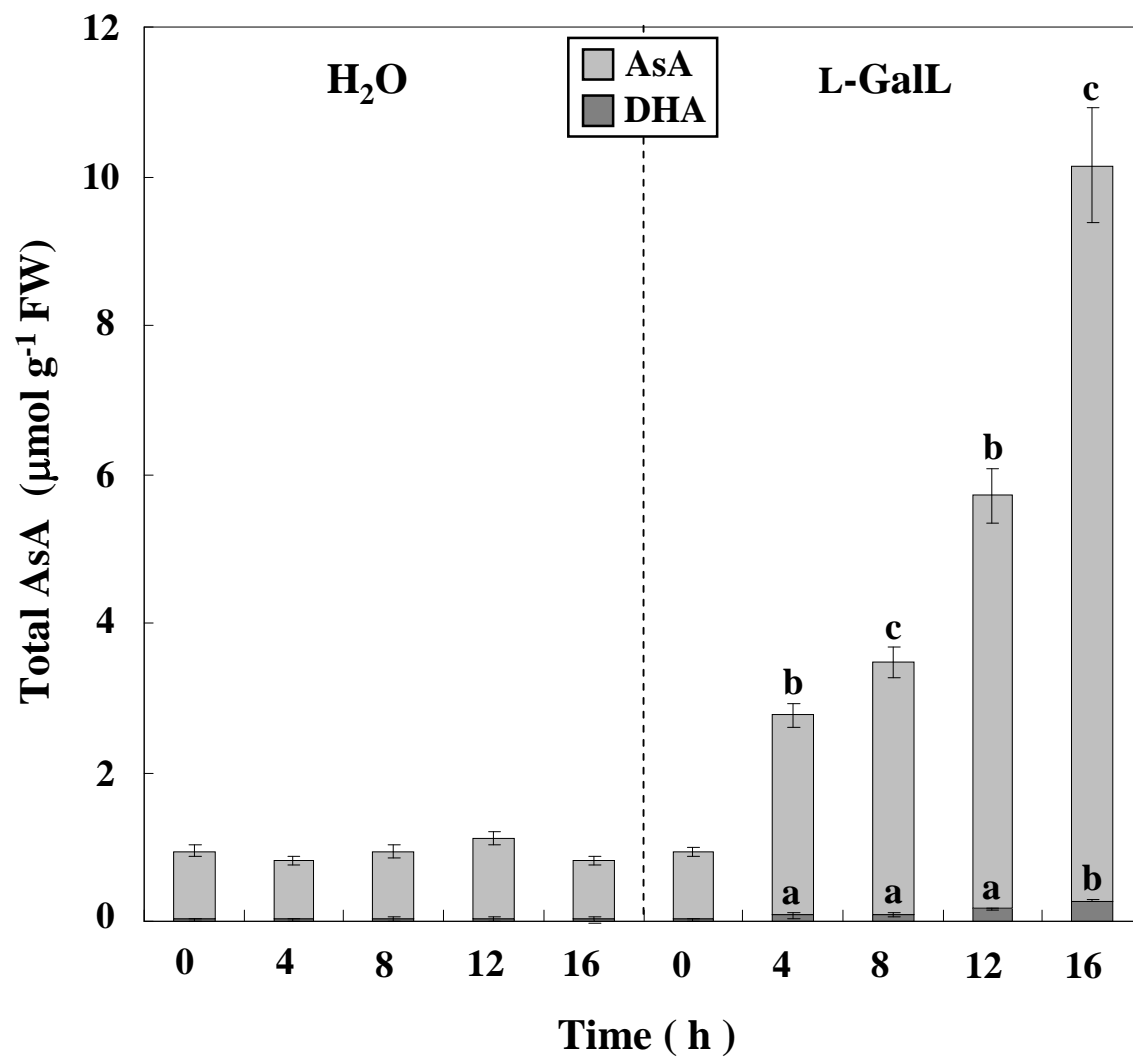

Figure S1 Gao et al.,

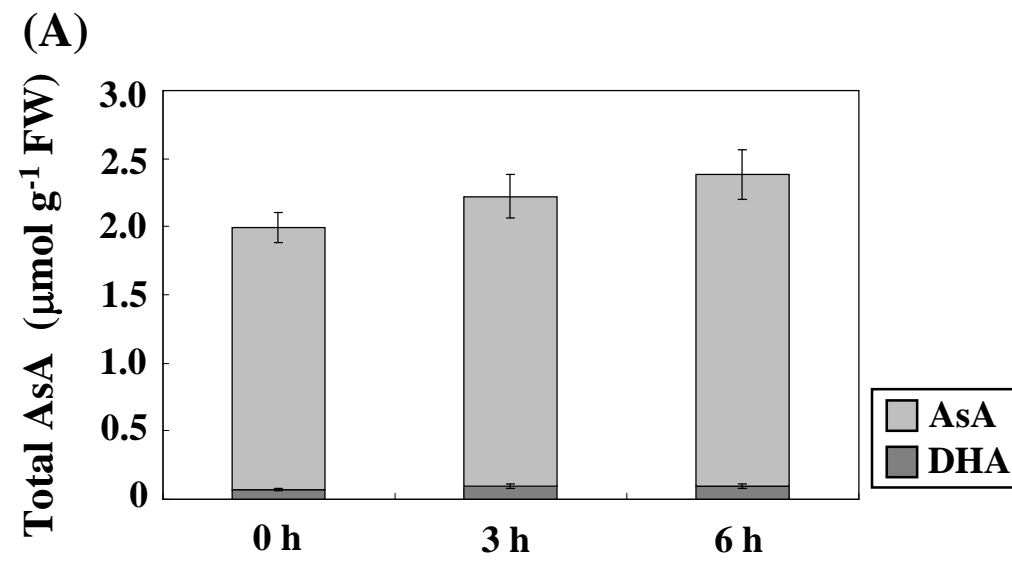

Figure S2A Gao et al.,

**(B)**

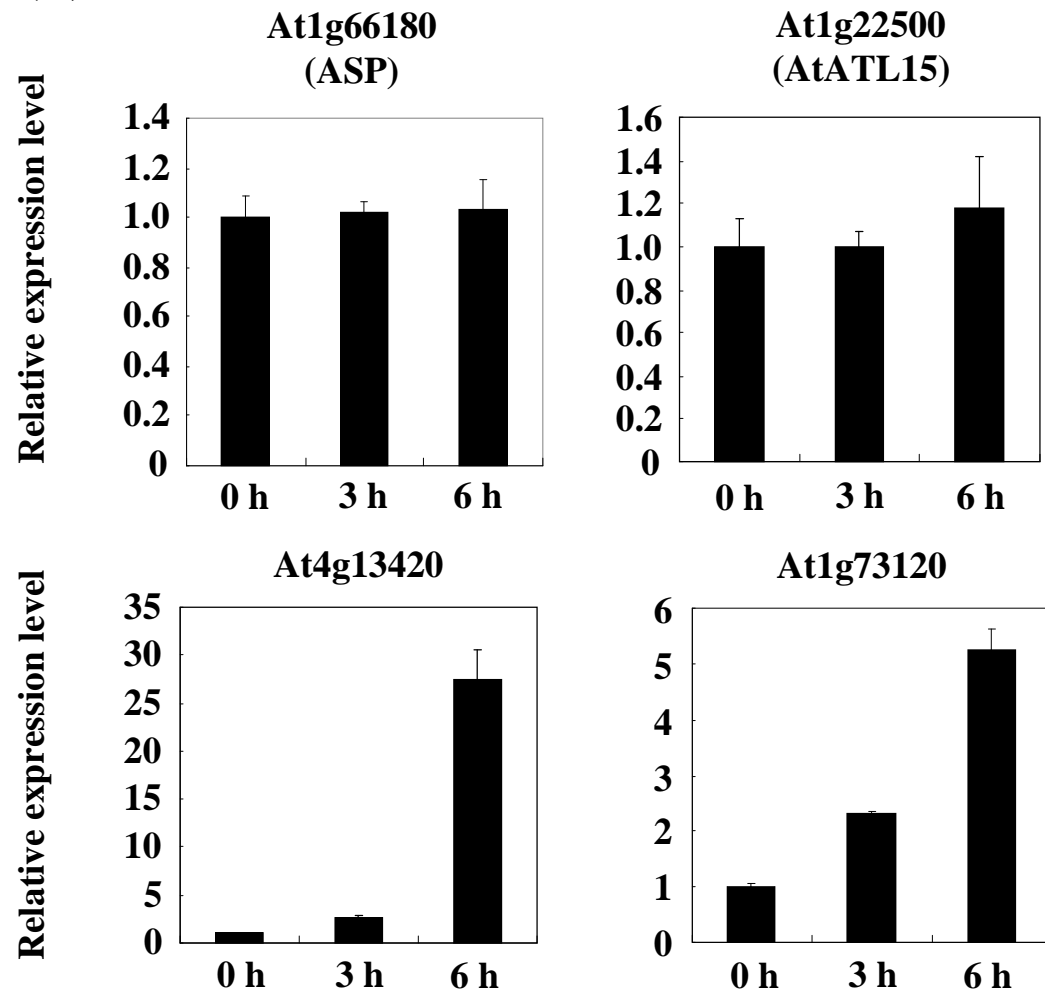

**Figure S2B Gao et al.,**

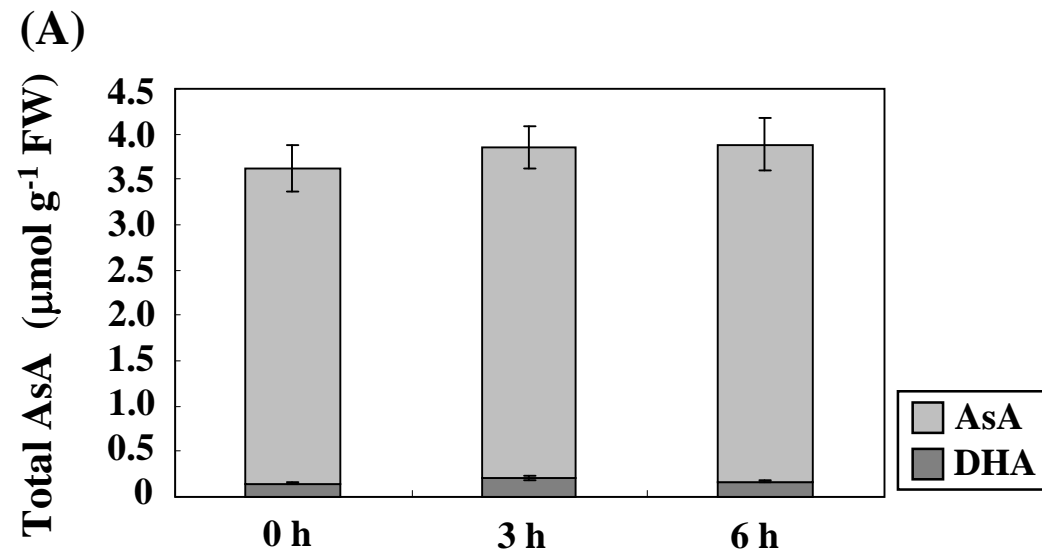

Figure S3A Gao et al.,

**(B)**

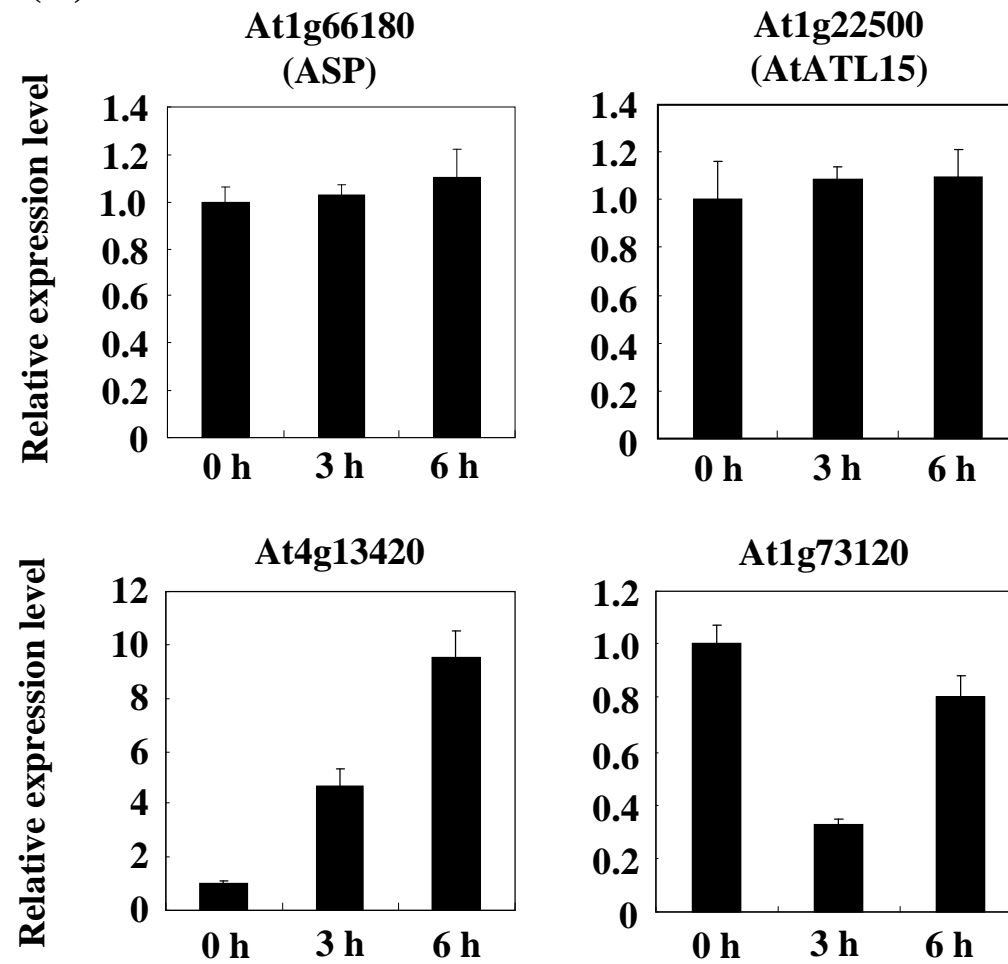

**Figure S3B Gao et al.,**



### Functional Categorization by annotation for : GO Cellular Component

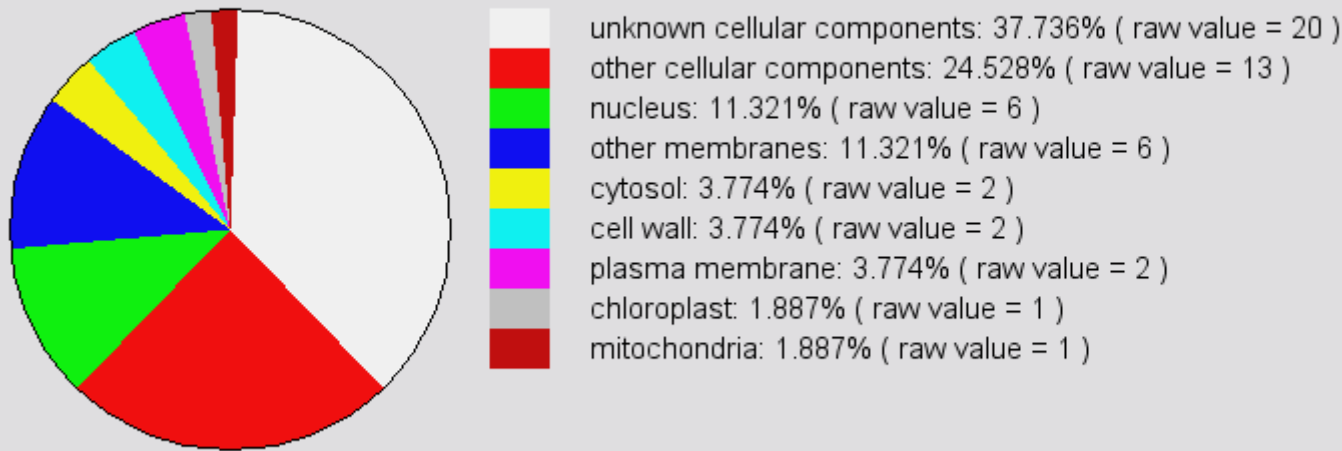

### Functional Categorization by annotation for : GO Biological Process

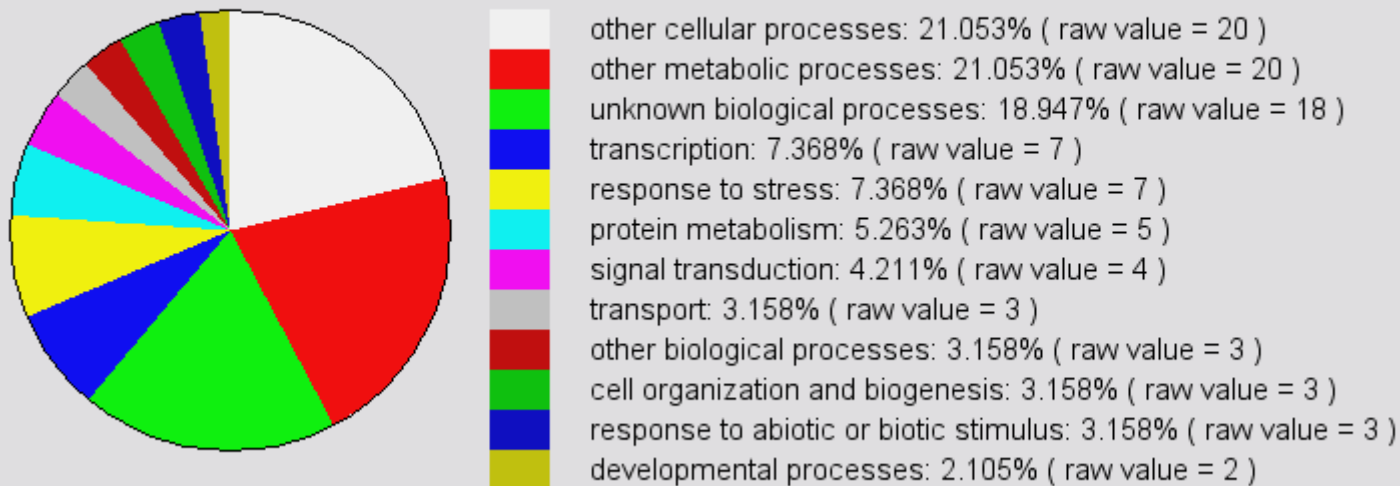

**Figure S4-1**  
**Gao et al.,**

### Functional Categorization by annotation for : GO Molecular Function

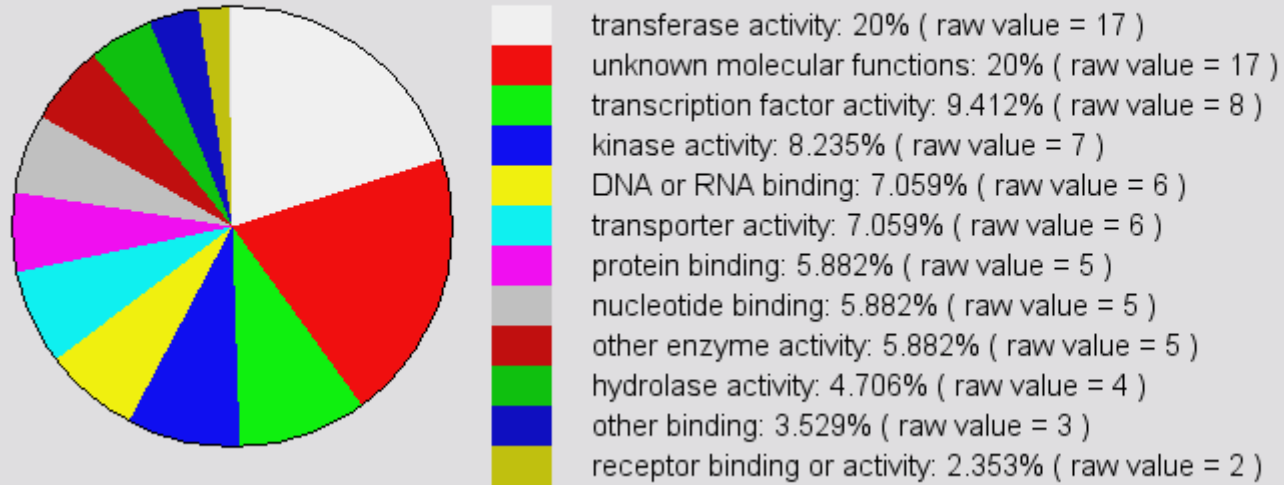

**Figure S4-2**  
**Gao et al.,**

a)

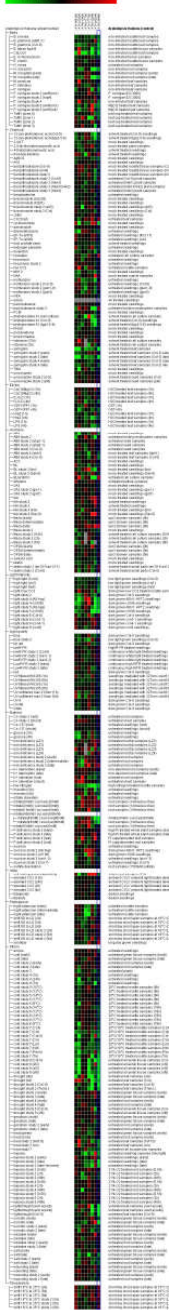

Fig. S5a Gao et al.

b)

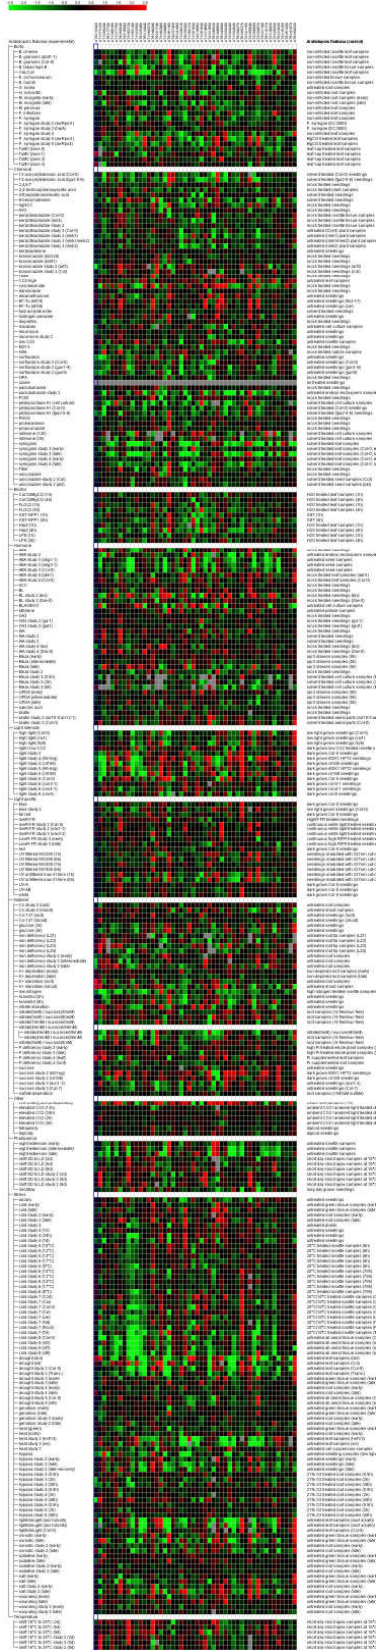

Fig. S5b Gao et al.

*vtc2.1* fed with L-GalL

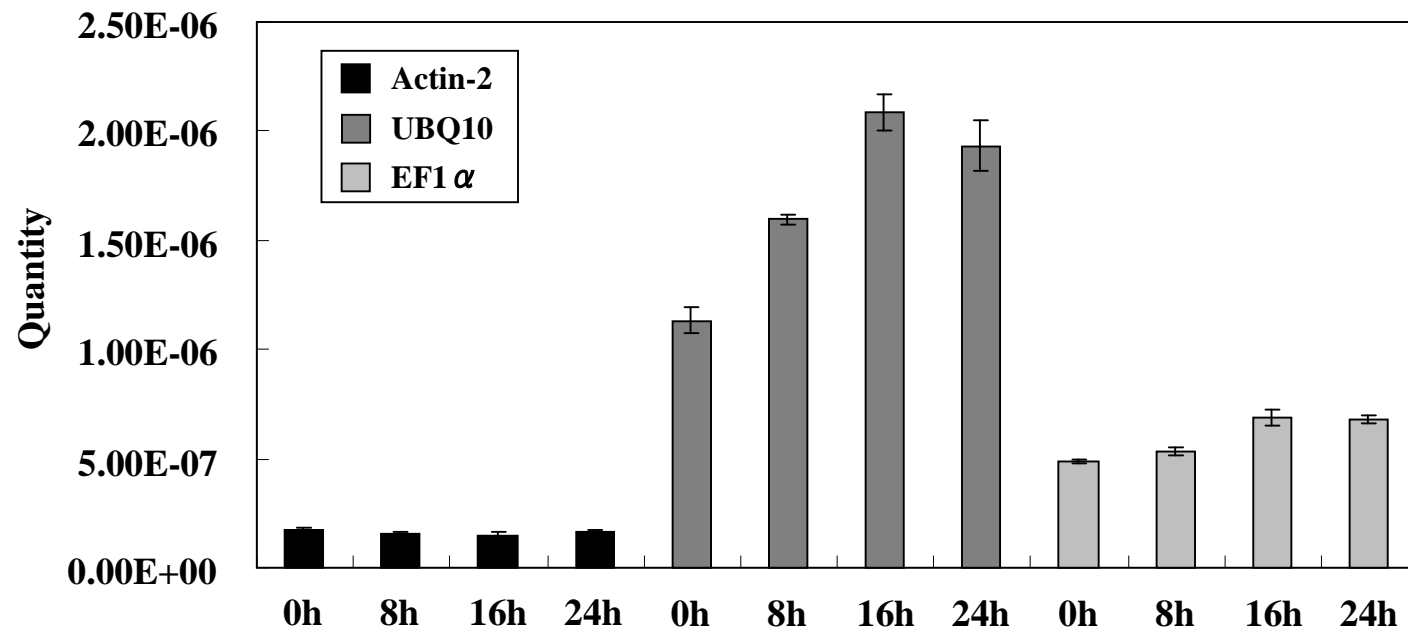

Figure S6A Gao et al.,

*vtc2.1* fed with H<sub>2</sub>O, D-Glu, L-GalL, AsA in the dark

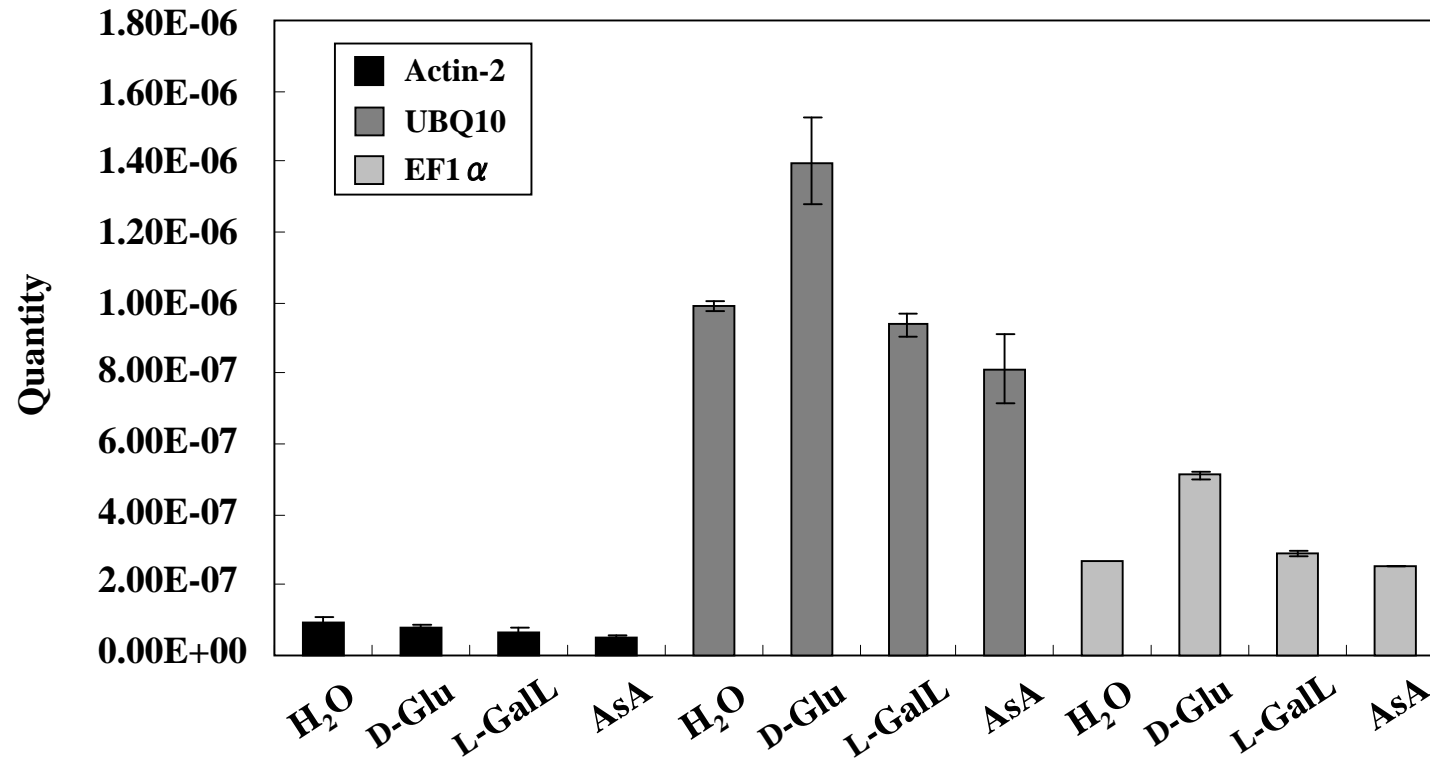

Figure S6B Gao et al.,

WT time course

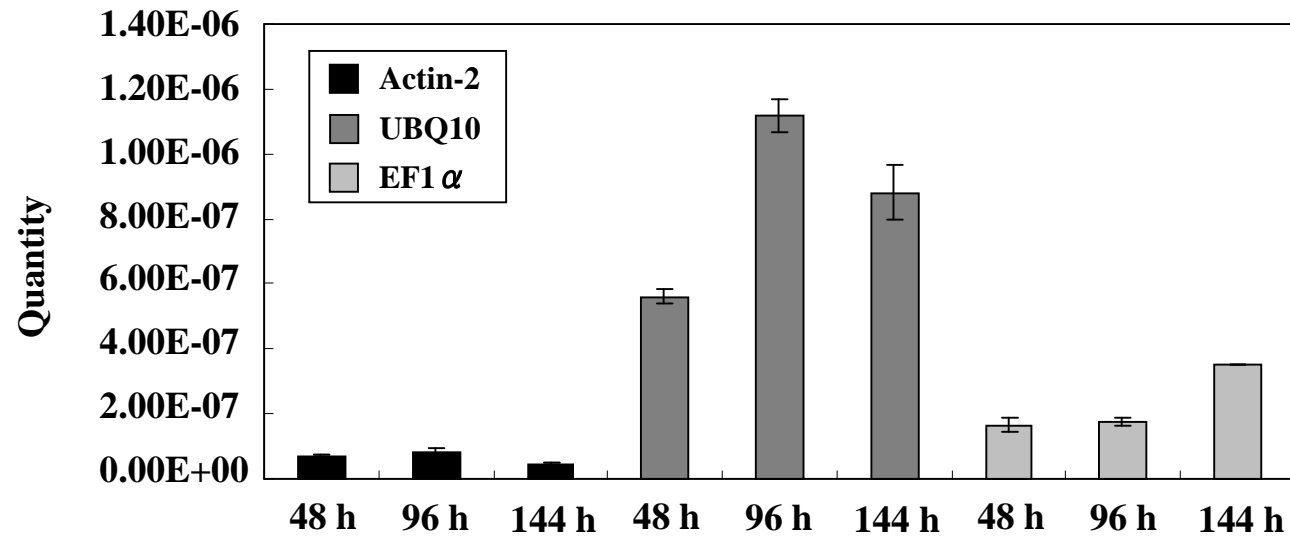

Figure S6C Gao et al.,

WT fed with H<sub>2</sub>O, D-Glu, L-Gall, AsA in the light

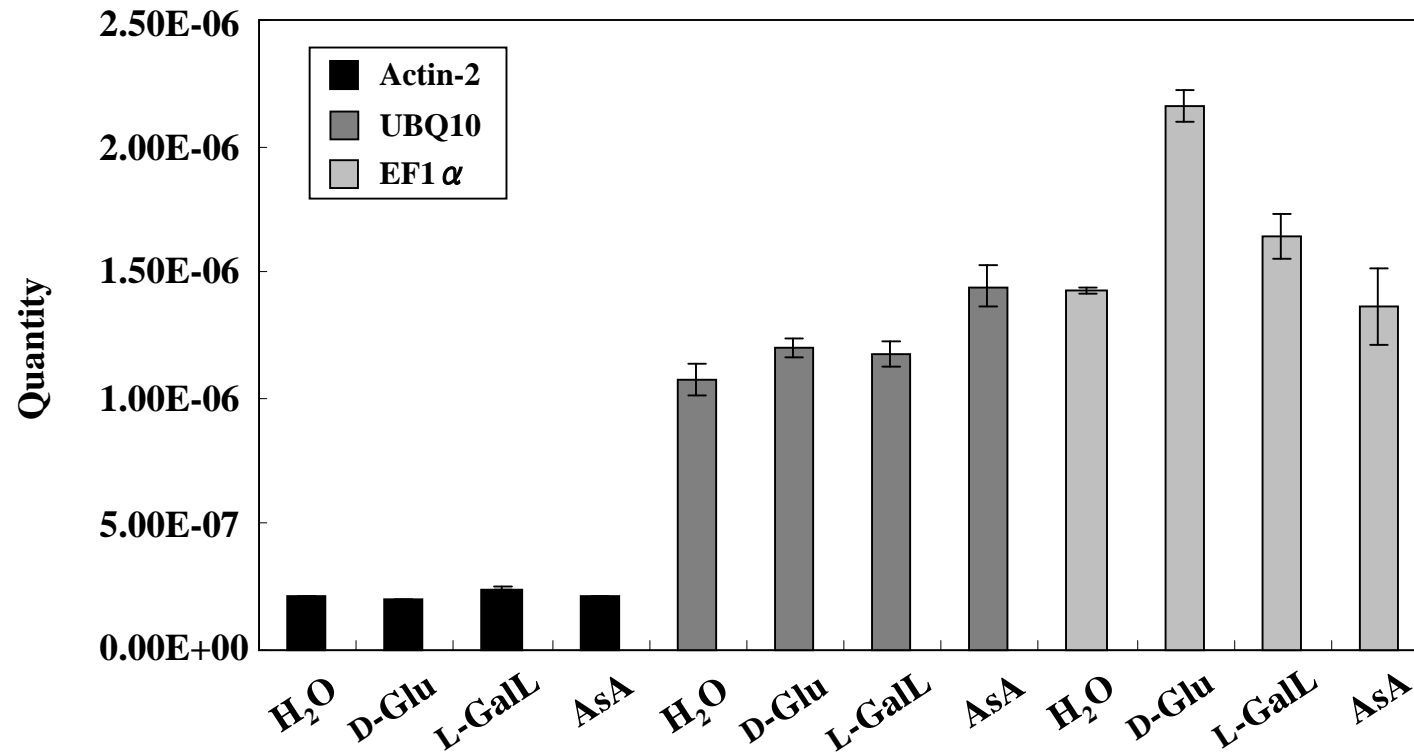

Figure S6D Gao et al.,
